# Supplementary material for: Learning the Effect of Registration Hyperparameters with HyperMorph
Source: PubMed Central journal article supplement (PMC9491317), 2022-04-07

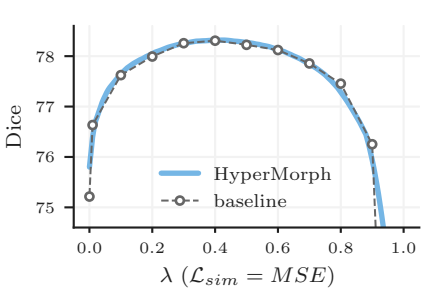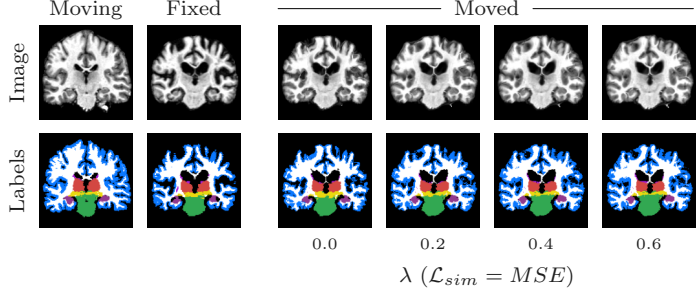

Supplement: NIHMS1835691-supplement-Figure_S1.pdf [file NIHMS1835691-supplement-Figure_S1.pdf]
