# Supplementary material for: Learning the Effect of Registration Hyperparameters with HyperMorph
Source: PubMed Central journal article supplement (PMC9491317), 2022-04-07
Supplement: NIHMS1835691-supplement-Figure_S2.pdf [file NIHMS1835691-supplement-Figure_S2.pdf]

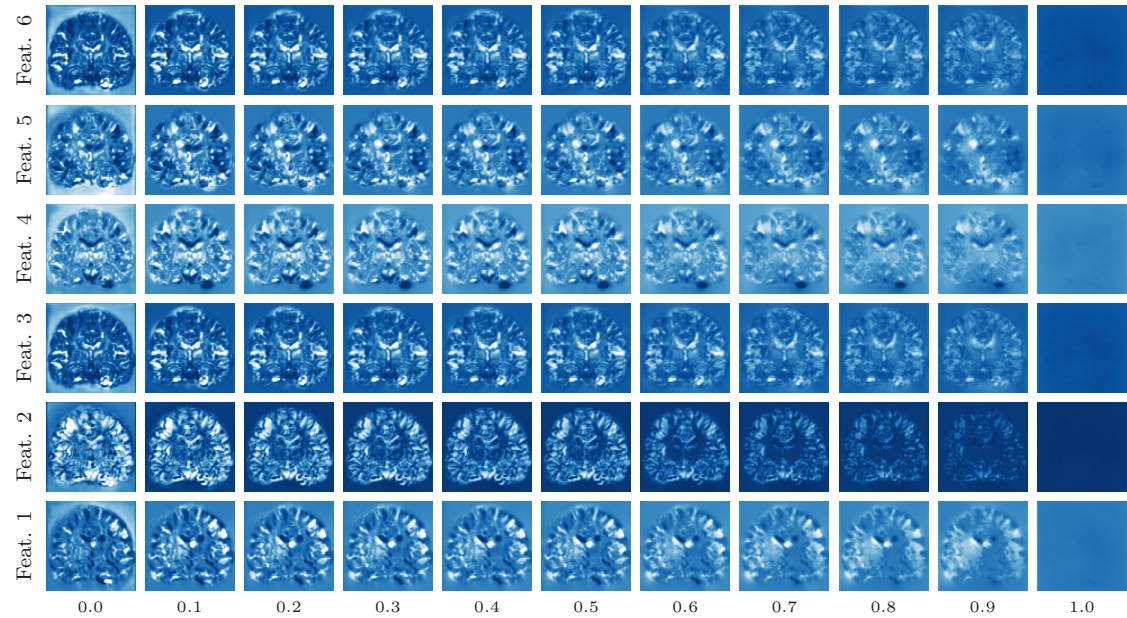

$$\lambda (\mathcal{L}_{sim} = MSE)$$
